# Supplementary figures and images for: BKV, CMV, and EBV Interactions and their Effect on Graft Function One Year Post-Renal Transplantation: Results from a Large Multi-Centre Study
Source: PubMed Central journal article supplement — eBioMedicine. 2018 Jul 30;34:113–21. doi: 10.1016/j.ebiom.2018.07.017 (PMC6116415; doi:10.1016/j.ebiom.2018.07.017), 2018-07-30

# Median GFR Difference between BKV over Threshold and Non-Reactivating

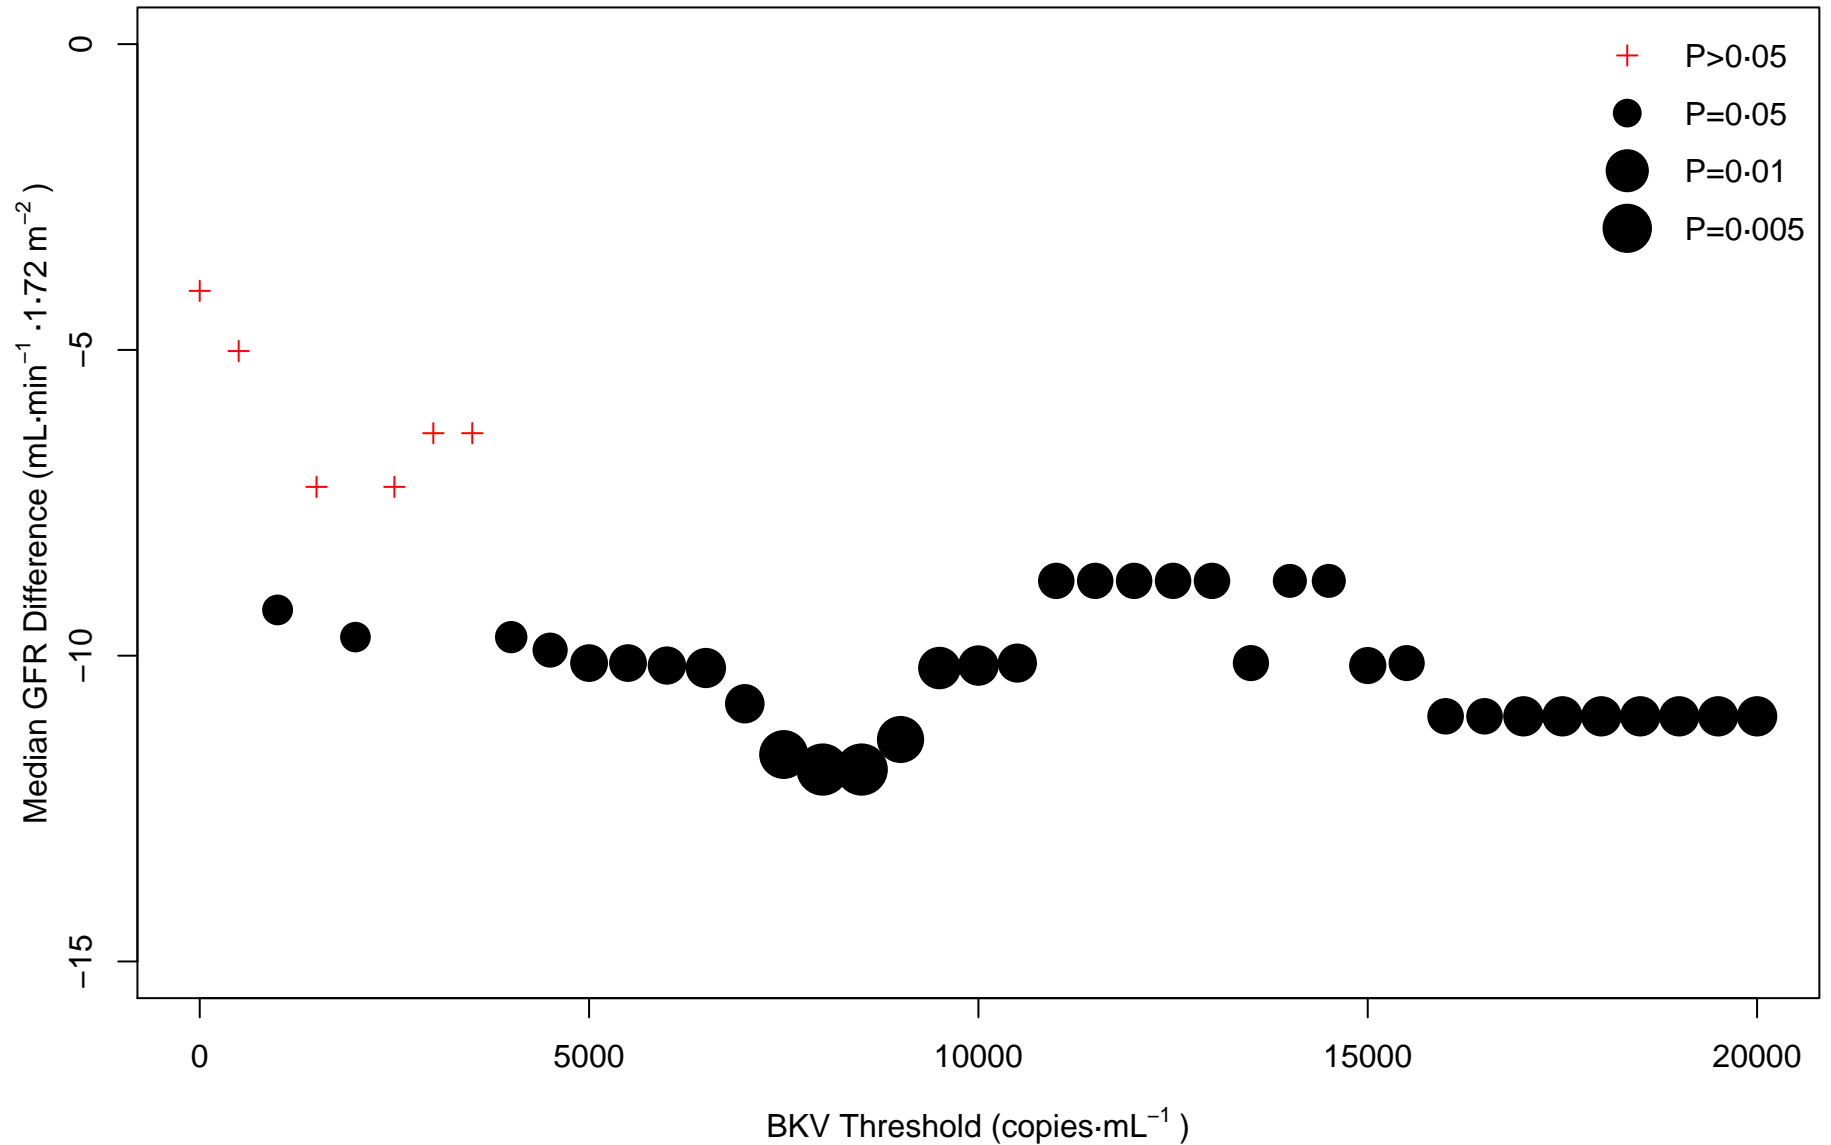

Supplement: mmc1.pdf [file mmc1.pdf]

# Median GFR Difference between CMV over Threshold and Non-Reactivating

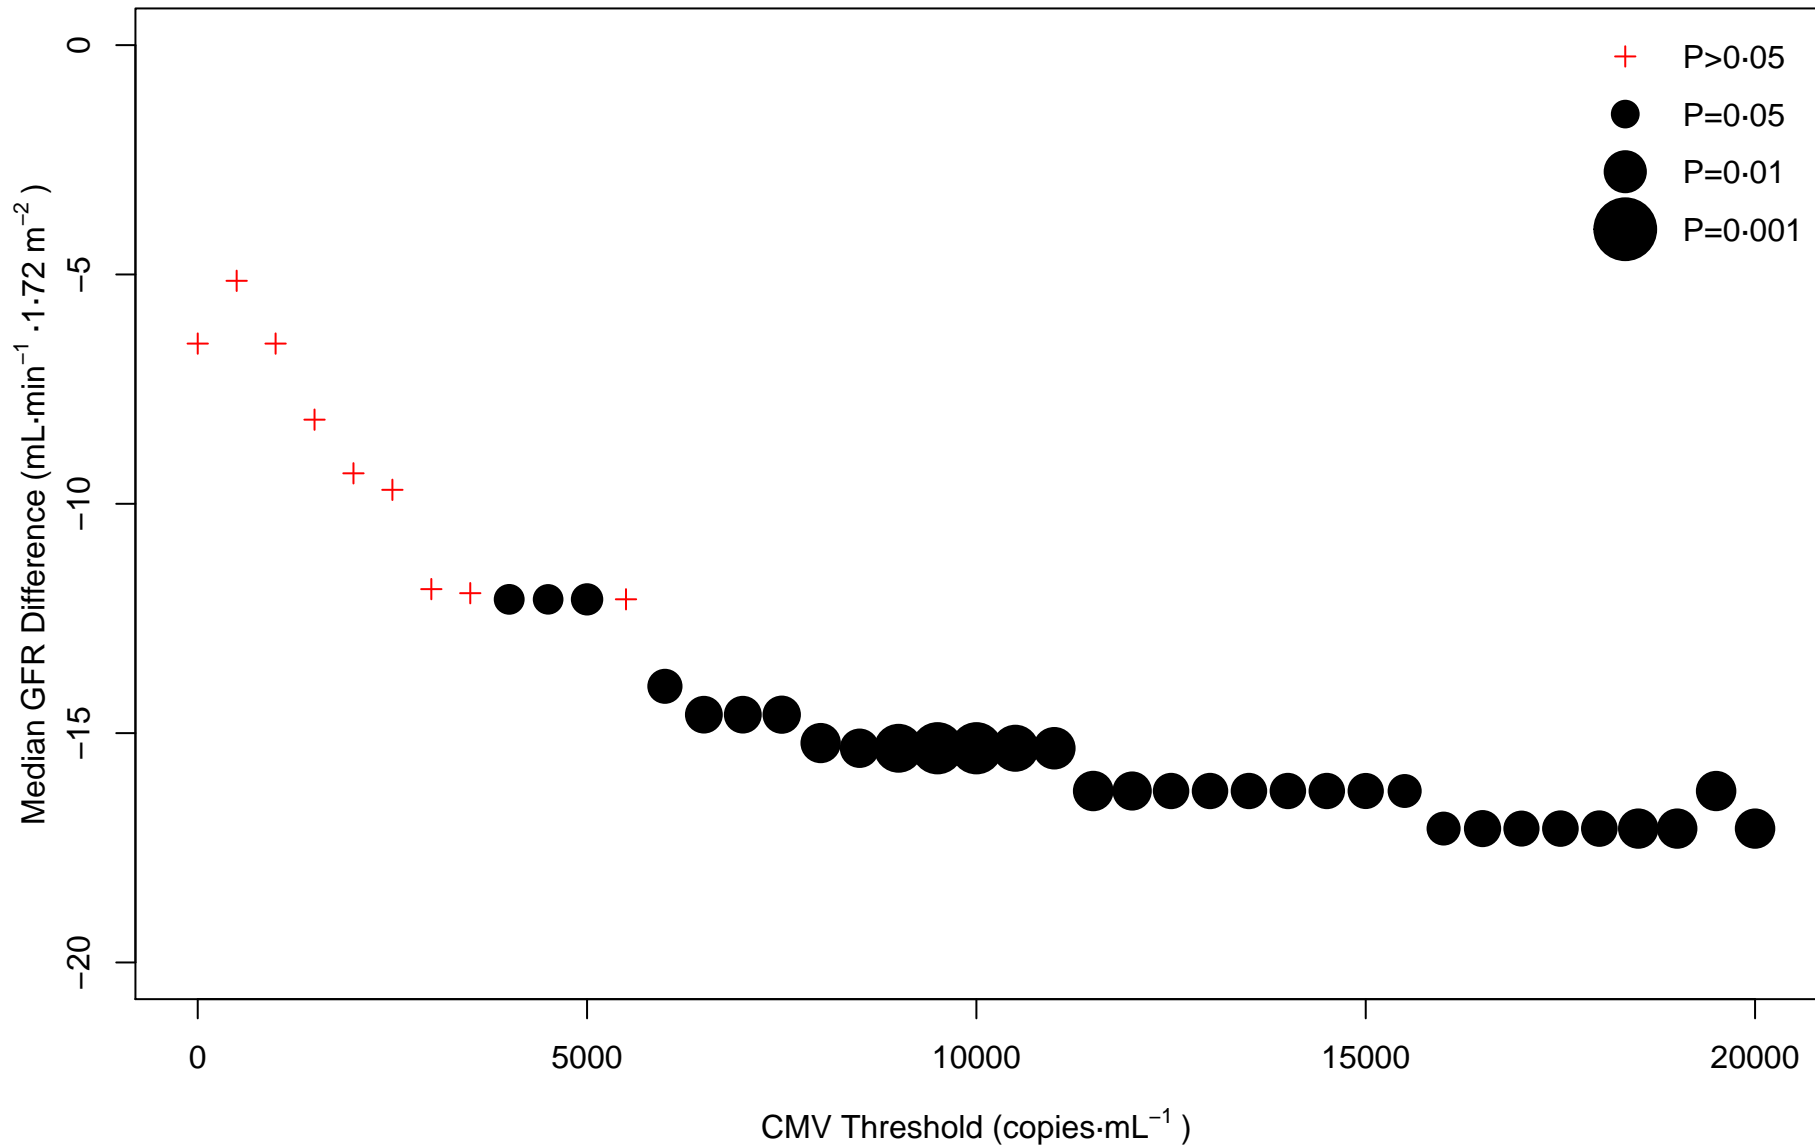

Supplement: mmc2.pdf [file mmc2.pdf]

# Significance of GFR Difference for CMV and BKV over Thresholds vs. Non-Reactivating

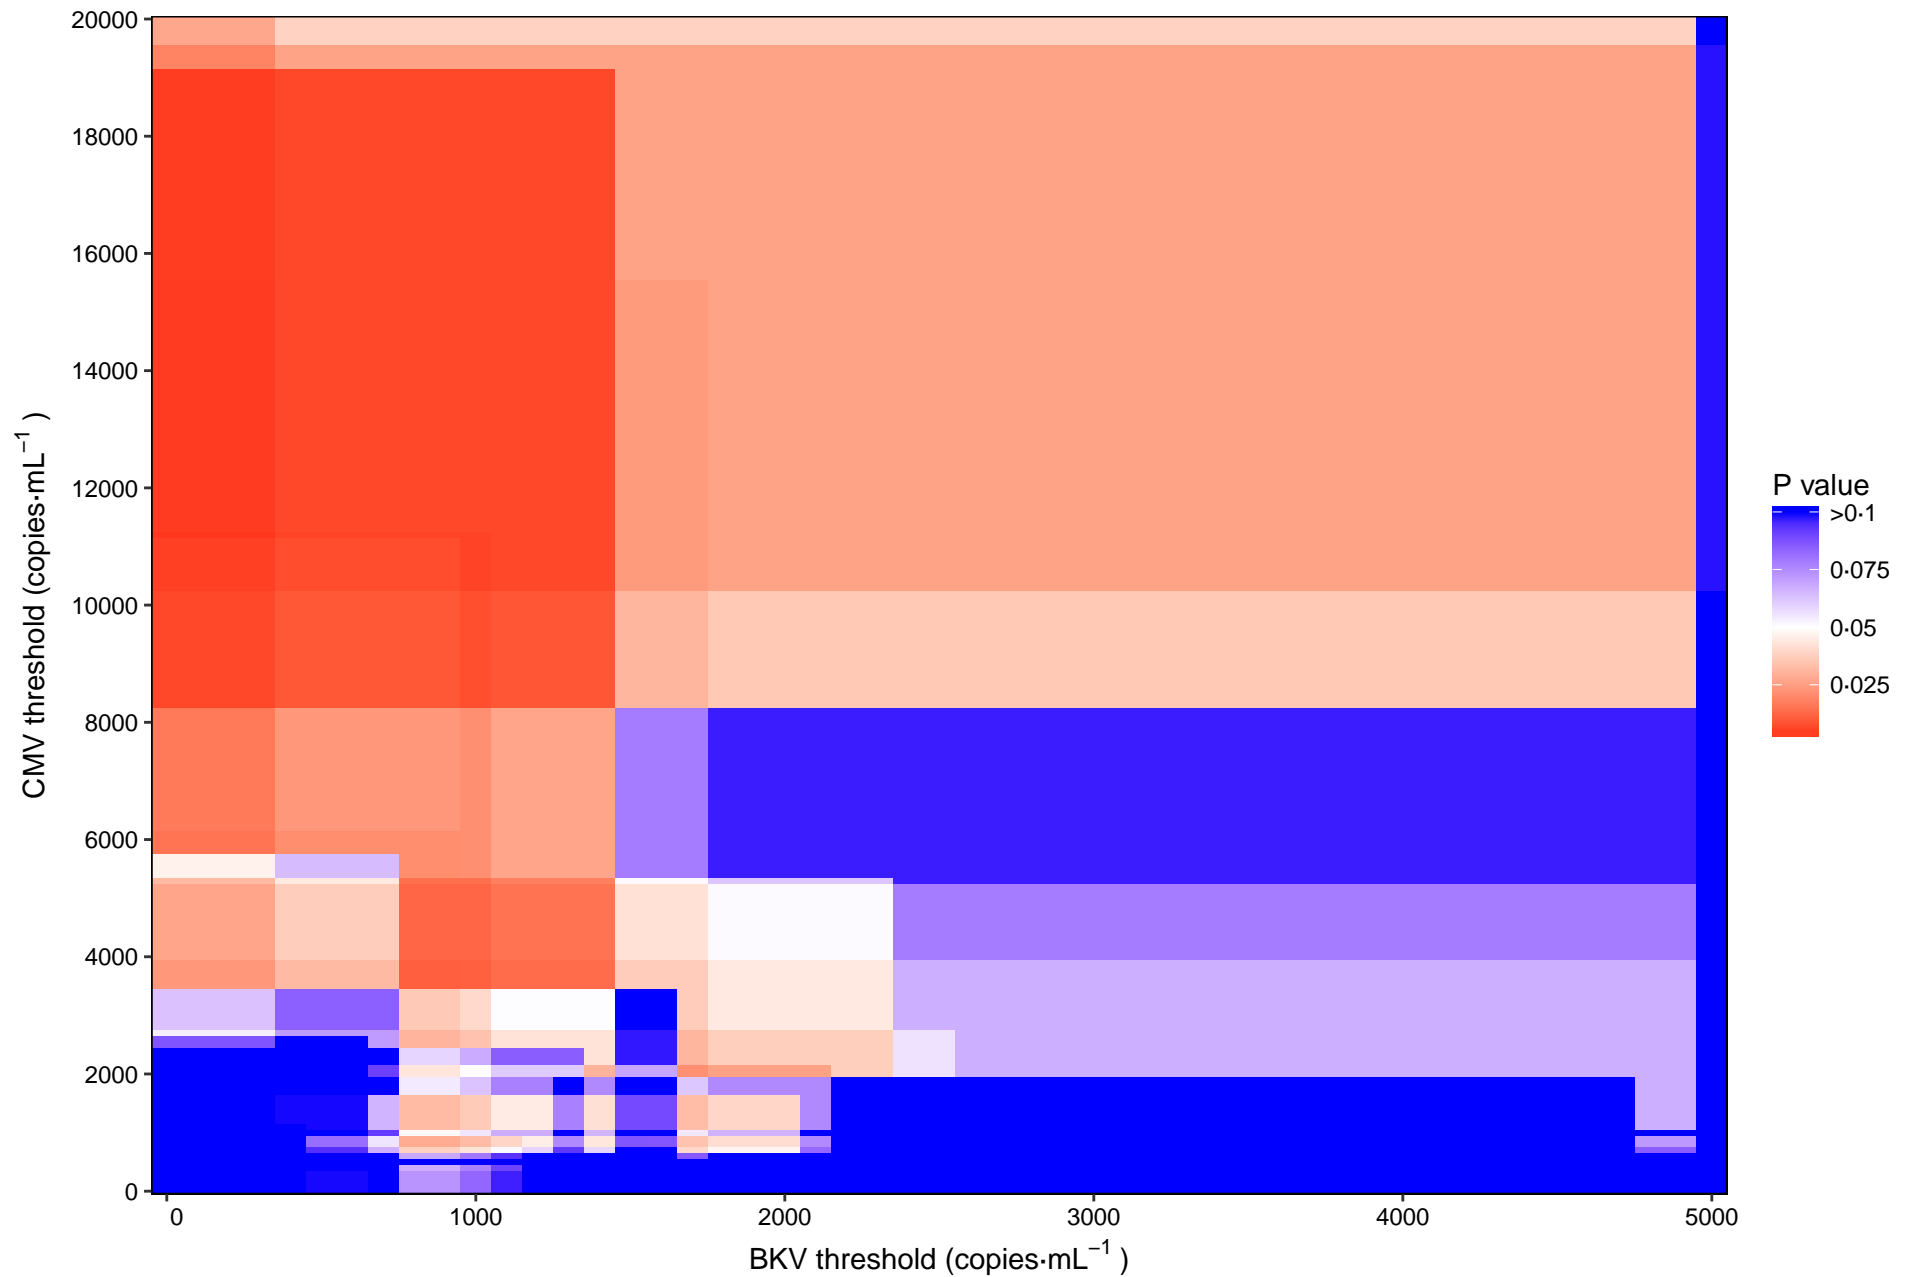

Supplement: mmc3.pdf [file mmc3.pdf]
